# Supplementary material
Source: ML conference proceedings conference paper supplement (https://openaccess.thecvf.com/content/cvpr_2017/html/Kannan_Newton-Type_Methods_for_2017_CVPR_paper.html)
Supplement: Supplementary file 1 [file Kannan_Newton-Type_Methods_for_2017_CVPR_supplemental.pdf]

# Supplementary material for “Newton-type Methods for Inference in Higher-Order Markov Random Fields”

Hariprasad Kannan  
CentraleSupélec-INRIA Saclay  
Université Paris-Saclay  
hkannan@gmail.com

Nikos Komodakis  
Ecole des Ponts ParisTech  
Université Paris Est  
nikos.komodakis@enpc.fr

Nikos Paragios  
CentraleSupélec-INRIA Saclay  
Université Paris-Saclay  
nikos.paragios@ecp.fr

## Abstract

*This document contains description of some points related to implementation and some experimental results.*

## 1. Numerically stable sum-product computation

When the damping parameter is increased to high values (low smoothness), the terms present in equations 13 and 14 will all take zero value and the summations in these equations will be of value zero, which is erroneous. This is because these terms are in fact exponentials of terms corresponding to the nodes and cliques. So,  $\psi_c(\mathbf{x}_c)$  and  $\psi_i(x_i)$  are of the form  $\exp(\theta_c(\mathbf{x}_c))$  and  $\exp(\theta_i(x_i))$ , respectively, in a suitably defined graphical model. This numerical issue is addressed by storing offsets ( $M_{bc}(\mathbf{x}_n)$ ) for each term of the message  $m_{bc}(\mathbf{x}_n)$ . Hence,  $m_{bc}(\mathbf{x}_n)$  in equation 13 is computed as follows,

$$m_{bc}(\mathbf{x}_n) = \sum_{\mathbf{x}_{b \setminus n}} \exp[\theta_b(\mathbf{x}_b) + \sum_{i \in b \setminus n} \theta_i(x_i) + \log(m_{ab}(\mathbf{x}_{b \setminus n})) - M_{bc}(\mathbf{x}_n)] \quad (1)$$

$$\text{where } M_{bc}(\mathbf{x}_n) = \max_{\mathbf{x}_{b \setminus n}} [\theta_b(\mathbf{x}_b) + \sum_{i \in b \setminus n} \theta_i(x_i) + \log(m_{ab}(\mathbf{x}_{b \setminus n}))] \quad (2)$$

This ensures that at least one term in the summation is of value 1, hence, the summation is assured to be non-zero. Later, the required marginals are computed as  $p_i^c(x_i) = \frac{\psi_i(x_i)}{Z} \sum_{\mathbf{x}_n} [(\prod_{j \in n \setminus i} \psi_j(x_j)) m_{bc}(\mathbf{x}_n)]$ , where  $Z$  ensures that the marginals sum to one. In this expression each summand is computed as  $[\sum_{j \in n \setminus i} \theta_j(x_j) + \log(m_{bc}(\mathbf{x}_n)) + M_{bc}(\mathbf{x}_n)]$ . This approach can be carefully extended to equation 14,

also. We will need to maintain two offsets,  $M_{bc}(\mathbf{x}_n)$  as before and also,  $\bar{M}$  corresponding to the second sum in equation 14.

## 2. Exit condition for large problems

A simultaneous criterion on function value difference, variable difference and gradient has been used (adapted from §8.2.3.2 [1]). Given adjacent iterations  $k$  and  $k + 1$ , for the dual function  $g(\delta)$ , function value difference is  $\Delta g = g_{k+1}(\delta) - g_k(\delta)$  and  $l_\infty$  norm of the step taken is  $\Delta \delta = \|\delta_{k+1} - \delta_k\|_\infty$ . Thus, the conditions enforced are  $\Delta g < 10^{-3}$ ,  $\Delta \delta < 10^{-3}$ ,  $\|\nabla g(\delta_{k+1})\|_\infty < 0.5$  and we exit if all these conditions are satisfied.

## 3. Additional result

Here, we present another result for stereo with curvature prior, which we didn't present in the main paper due to lack of space. As before, the cliques are of shape  $1 \times 3$  and  $3 \times 1$  and the clique energies are truncated and the unaries are absolute differences. The results are for Venus, image size  $191 \times 217$ , 20 depth levels. As before, pattern-based sum-product was computed on clique chains. AD3 showed poor convergence behavior for this large problem, also. FISTA ran for more than 180 iterations without converging.

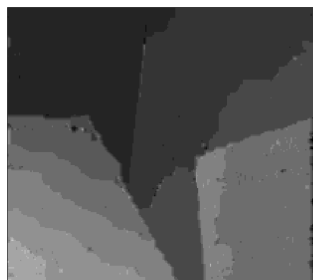

Figure 1. Venus result for quasi-Newton. Iterations: 102. Non-smooth dual: 39153. Integer primal: 39230.5.

## References

- [1] P. E. Gill, W. Murray, and M. H. Wright. Practical optimization. 1981. 1
